# Supplementary material for: Potential Mimicry of Viral and Pancreatic β Cell Antigens Through Non-Spliced and cis-Spliced Zwitter Epitope Candidates in Type 1 Diabetes
Source: PubMed Central journal article supplement (PMC8082463; doi:10.3389/fimmu.2021.656451), 2021-04-15
Supplement: DataSheet_1.pdf [file DataSheet_1.pdf]

**Supplementary information**
**Potential mimicry of viral and pancreatic  $\beta$  cell antigens through non-spliced and *cis*-spliced *zwitter* epitope candidates in Type 1 Diabetes**

§ Correspondence to: [michele.mishto@kcl.ac.uk](mailto:michele.mishto@kcl.ac.uk), [jliepe@mpibpc.mpg.de](mailto:jliepe@mpibpc.mpg.de).

|            |                                                                                                                                                                                              |
|------------|----------------------------------------------------------------------------------------------------------------------------------------------------------------------------------------------|
| Table S1   | List of virus strains included in the study                                                                                                                                                  |
| Table S2   | Peptide-HLA-I binding affinity, reported as IC <sub>50</sub> and used as cut-offs                                                                                                            |
| Table S3   | Gonzalez-Duque's T1D-associated antigen list                                                                                                                                                 |
| Table S4   | List of viral-human <i>zwitter</i> non-spliced peptide candidates                                                                                                                            |
| Table S5   | List of viral-human <i>zwitter cis</i> -spliced peptide candidates                                                                                                                           |
| Figure S1  | Peptide-HLA-I binding affinity distribution of the 14 HLA-I alleles enrolled in the study                                                                                                    |
| Figure S2  | Human pancreatic islets and mTECs' mRNA expression of antigens potentially carrying HLA-A*01:01-restricted viral-human non-spliced and <i>cis</i> -spliced <i>zwitter</i> peptide candidates |
| Figure S3  | Human pancreatic islets and mTECs' mRNA expression of antigens potentially carrying HLA-A*03:01-restricted viral-human non-spliced and <i>cis</i> -spliced <i>zwitter</i> peptide candidates |
| Figure S4  | Human pancreatic islets and mTECs' mRNA expression of antigens potentially carrying HLA-A*11:01-restricted viral-human non-spliced and <i>cis</i> -spliced <i>zwitter</i> peptide candidates |
| Figure S5  | Human pancreatic islets and mTECs' mRNA expression of antigens potentially carrying HLA-A*23:01-restricted viral-human non-spliced and <i>cis</i> -spliced <i>zwitter</i> peptide candidates |
| Figure S6  | Human pancreatic islets and mTECs' mRNA expression of antigens potentially carrying HLA-A*24:02-restricted viral-human non-spliced and <i>cis</i> -spliced <i>zwitter</i> peptide candidates |
| Figure S7  | Human pancreatic islets and mTECs' mRNA expression of antigens potentially carrying HLA-B*07:02-restricted viral-human non-spliced and <i>cis</i> -spliced <i>zwitter</i> peptide candidates |
| Figure S8  | Human pancreatic islets and mTECs' mRNA expression of antigens potentially carrying HLA-B*08:01-restricted viral-human non-spliced and <i>cis</i> -spliced <i>zwitter</i> peptide candidates |
| Figure S9  | Human pancreatic islets and mTECs' mRNA expression of antigens potentially carrying HLA-B*15:01-restricted viral-human non-spliced and <i>cis</i> -spliced <i>zwitter</i> peptide candidates |
| Figure S10 | Human pancreatic islets and mTECs' mRNA expression of antigens potentially carrying HLA-B*35:01-restricted viral-human non-spliced and <i>cis</i> -spliced <i>zwitter</i> peptide candidates |
| Figure S11 | Human pancreatic islets and mTECs' mRNA expression of antigens potentially carrying HLA-B*39:06-restricted viral-human non-spliced and <i>cis</i> -spliced <i>zwitter</i> peptide candidates |

## T1D-associated *cis*-spliced *zwitter* epitope candidates

|            |                                                                                                                                                                                              |
|------------|----------------------------------------------------------------------------------------------------------------------------------------------------------------------------------------------|
| Figure S12 | Human pancreatic islets and mTECs' mRNA expression of antigens potentially carrying HLA-B*40:01-restricted viral-human non-spliced and <i>cis</i> -spliced <i>zwitter</i> peptide candidates |
| Figure S13 | Human pancreatic islets and mTECs' mRNA expression of antigens potentially carrying HLA-B*44:02-restricted viral-human non-spliced and <i>cis</i> -spliced <i>zwitter</i> peptide candidates |
| Figure S14 | Human pancreatic islets and mTECs' mRNA expression of antigens potentially carrying HLA-B44:03-restricted viral-human non-spliced and <i>cis</i> -spliced <i>zwitter</i> peptide candidates  |

## T1D-associated *cis*-spliced *zwitter* epitope candidates

| Virus                 | Acronym | Strain      |
|-----------------------|---------|-------------|
| Coxsackievirus B1     | CVB1    | Japan       |
| Coxsackievirus B4     | CVB4    | E2          |
| Epstein-Barr virus    | EBV     | B95 8 HHV 4 |
| Human cytomegalovirus | HCMV    | AD169       |
| Human herpesvirus 6A  | HHV-6A  | 6A          |
| Human herpesvirus 6B  | HHV-6B  | 6B          |
| Human parechovirus 2  | HPeV2   | Williamson  |
| Rotavirus C           | RVC     | Isolate RVC |

**Table S1. List of virus strains included in the study.** Viruses included in this study are listed with their respective strains and acronyms.

| HLA complex | IC50 cut-off (nM) |
|-------------|-------------------|
| HLA-A*02:01 | 500.0             |
| HLA-A*01:01 | 1486.5            |
| HLA-A*03:01 | 482.3             |
| HLA-A*11:01 | 132.2             |
| HLA-A*23:01 | 263.7             |
| HLA-A*24:02 | 519.9             |
| HLA-B*07:02 | 239.3             |
| HLA-B*08:01 | 1687.7            |
| HLA-B*15:01 | 357.7             |
| HLA-B*35:01 | 153.9             |
| HLA-B*39:06 | 5574.7            |
| HLA-B*40:01 | 171.0             |
| HLA-B*44:02 | 550.0             |
| HLA-B*44:03 | 650.2             |

**Table S2. Peptide-HLA-I binding affinity, reported as IC<sub>50</sub> and used as cut-offs.** These cut-offs corresponded to 91.4%-ile of peptides present in the HLA-I immunopeptidome databases of IEDB database [1].

**Table S3. Gonzalez-Duque's T1D-associated antigen list.** This list of T1D-associated antigens was published by Gonzalez-Duque and colleagues [2] as Figure 2B in the cognate paper. The file is accessible as Supplementary material in Frontiers in Immunology.

**Table S4. List of viral-human *zwitter* non-spliced peptide candidates.** This list includes viral-human *zwitter* 9mer viral non-spliced peptides. The file is accessible in the repository Mendeley dataset: <http://dx.doi.org/10.17632/z9g9knjxgw.1>

**Table S5. List of viral-human *zwitter cis*-spliced peptide candidates.** This list includes theoretical *zwitter* 9mer viral non-spliced / human *cis*-spliced, viral *cis*-spliced / human non-spliced and viral *cis*-spliced / human *cis*-spliced peptides. Unless differently stated, they are all grouped under the definition of viral-human *zwitter cis*-spliced peptide candidates in this manuscript. The file is accessible in the repository Mendeley dataset: <http://dx.doi.org/10.17632/z9g9knjxgw.1>

## T1D-associated *cis*-spliced *zwitter* epitope candidates

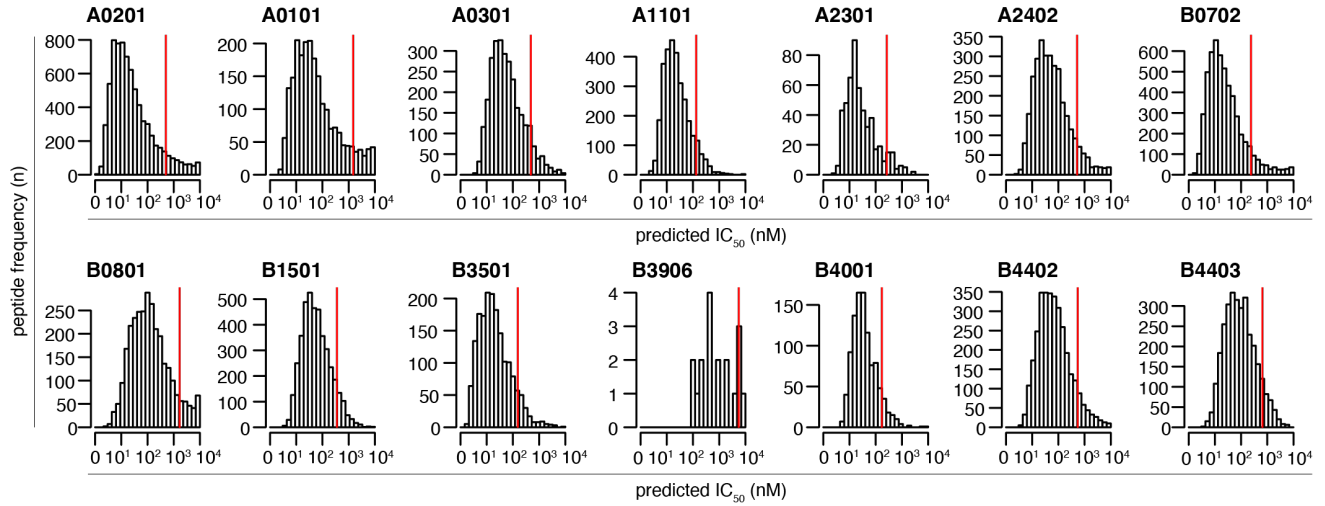

**Figure S1. Peptide-HLA-I binding affinity distribution of the 14 HLA-I alleles enrolled in the study.** The distribution of the binding affinity parameter  $IC_{50}$  among the HLA-I immunopeptidomes specific for the HLA-A\*01:01, -A\*02:01, -A\*03:01, -A\*11:01, -A\*23:01, -A\*24:02, -B\*07:02, -B\*08:01, -B\*15:01, -B\*35:01, -B\*39:06, -B\*40:01, -B\*44:02, -B\*44:03 alleles as reported in IEDB database. The  $IC_{50}$  was predicted by using NetMHCpan-BA4.0 algorithm [3]. Red lines represent the  $IC_{50}$  cut-off reported in **Table S2**.

## T1D-associated *cis*-spliced *twitter* epitope candidates

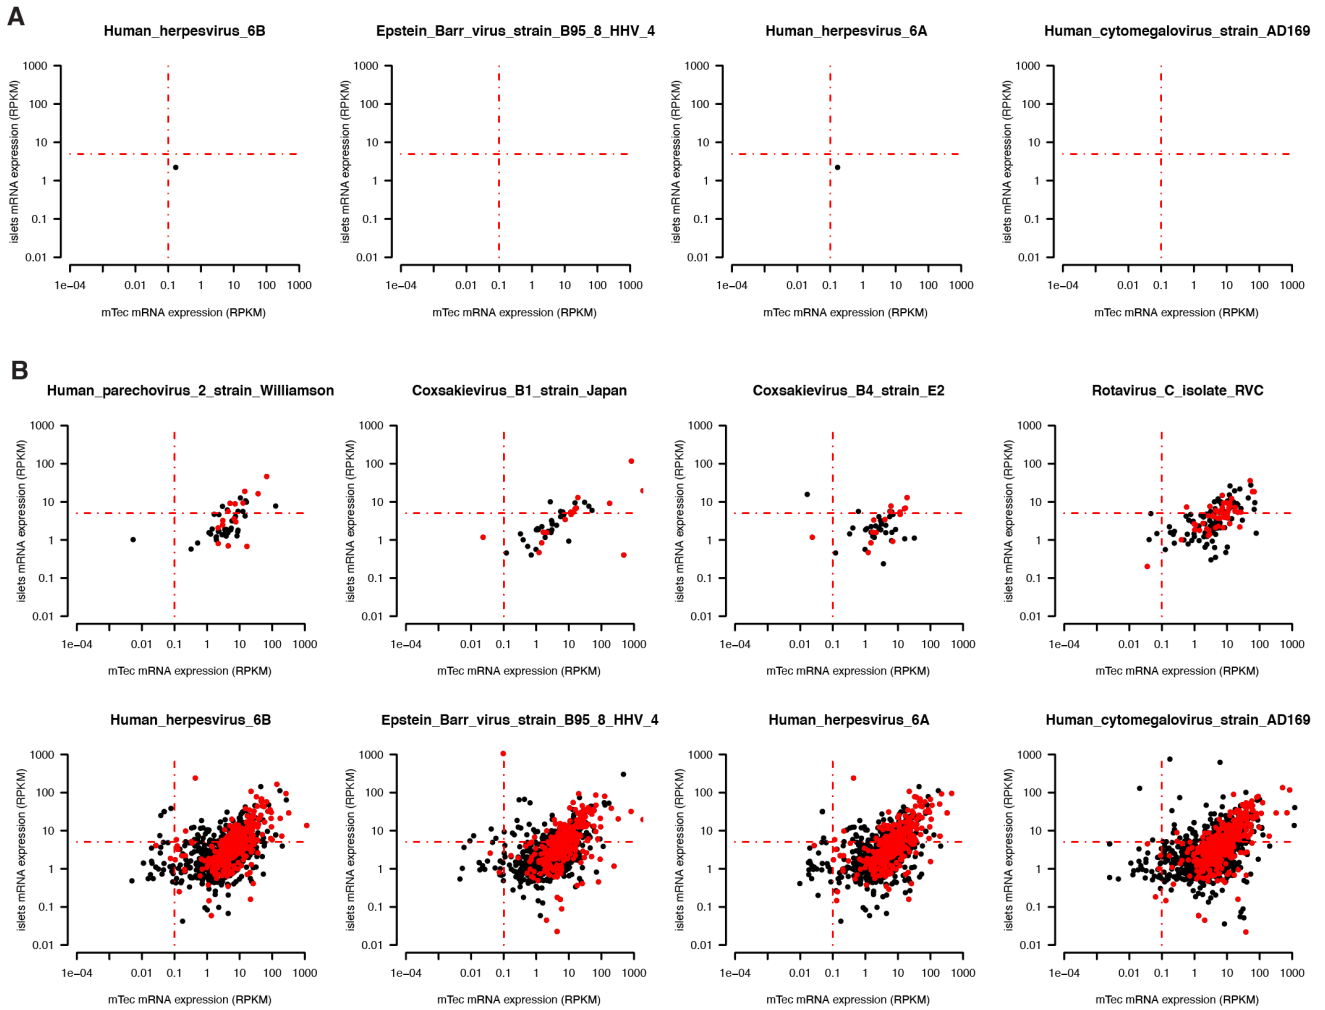

**Figure S2. Human pancreatic islets and mTECs' mRNA expression of antigens potentially carrying HLA-A\*01:01-restricted viral-human non-spliced and *cis*-spliced *twitter* peptide candidates.** The scatter plots depict the distribution of RPKM of mRNA of human antigens, as measured by Gonzalez-Duque and colleagues [2] in human pancreatic islets and mTECs, that theoretically can carry (A) non-spliced and (B) *cis*-spliced viral-human *twitter* epitope candidates. Scatter plots are divided based on the corresponding theoretical virus origin. In (A) only four out of eight viruses are shown because for four viruses no viral-human non-spliced peptide candidates with the required characteristics were estimated. Black dots represent antigens carrying epitope candidates predicted to bind the HLA-A\*01:01 allele. Red dots represent antigens carrying epitope candidates predicted to bind the HLA-A\*01:01 allele and located in hotspots, according to IEDB database.

## T1D-associated *cis*-spliced *twitter* epitope candidates

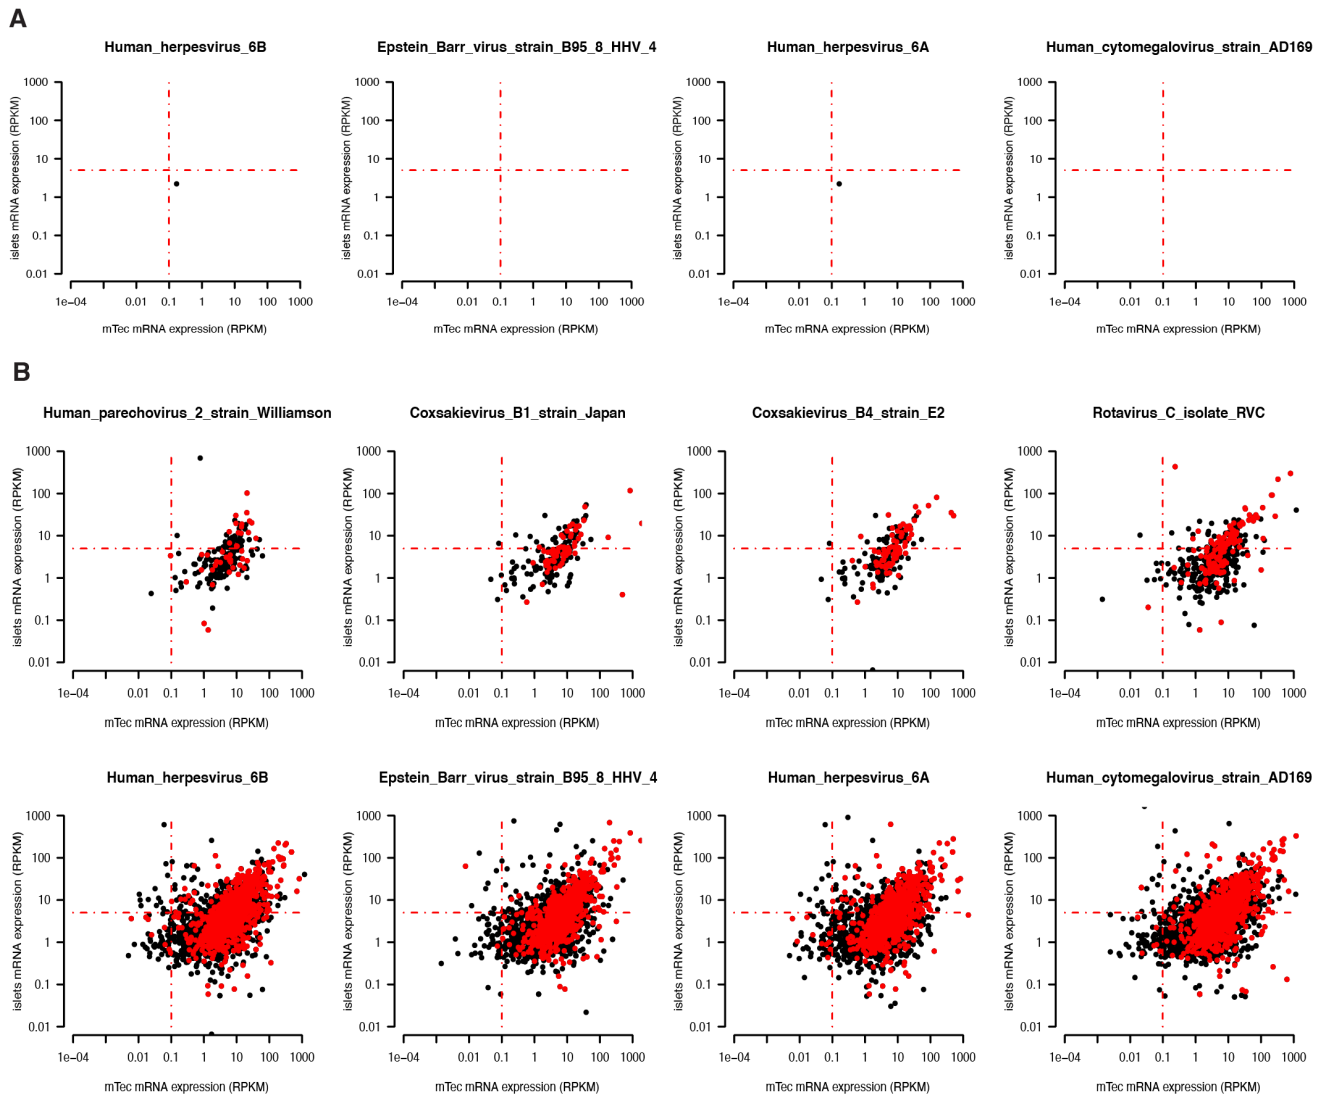

**Figure S3. Human pancreatic islets and mTECs' mRNA expression of antigens potentially carrying HLA-A\*03:01-restricted viral-human non-spliced and *cis*-spliced *twitter* peptide candidates.** The scatter plots depict the distribution of RPKM of mRNA of human antigens, as measured by Gonzalez-Duque and colleagues [2] in human pancreatic islets and mTECs, that theoretically can carry (A) non-spliced and (B) *cis*-spliced viral-human *twitter* epitope candidates. Scatter plots are divided based on the corresponding theoretical virus origin. In (A) only four out of eight viruses are shown because for four viruses no viral-human non-spliced peptide candidates with the required characteristics were estimated. Black dots represent antigens carrying epitope candidates predicted to bind the HLA-A\*03:01 allele. Red dots represent antigens carrying epitope candidates predicted to bind the HLA-A\*03:01 allele and located in hotspots, according to IEDB database.

## T1D-associated *cis*-spliced *zwitter* epitope candidates

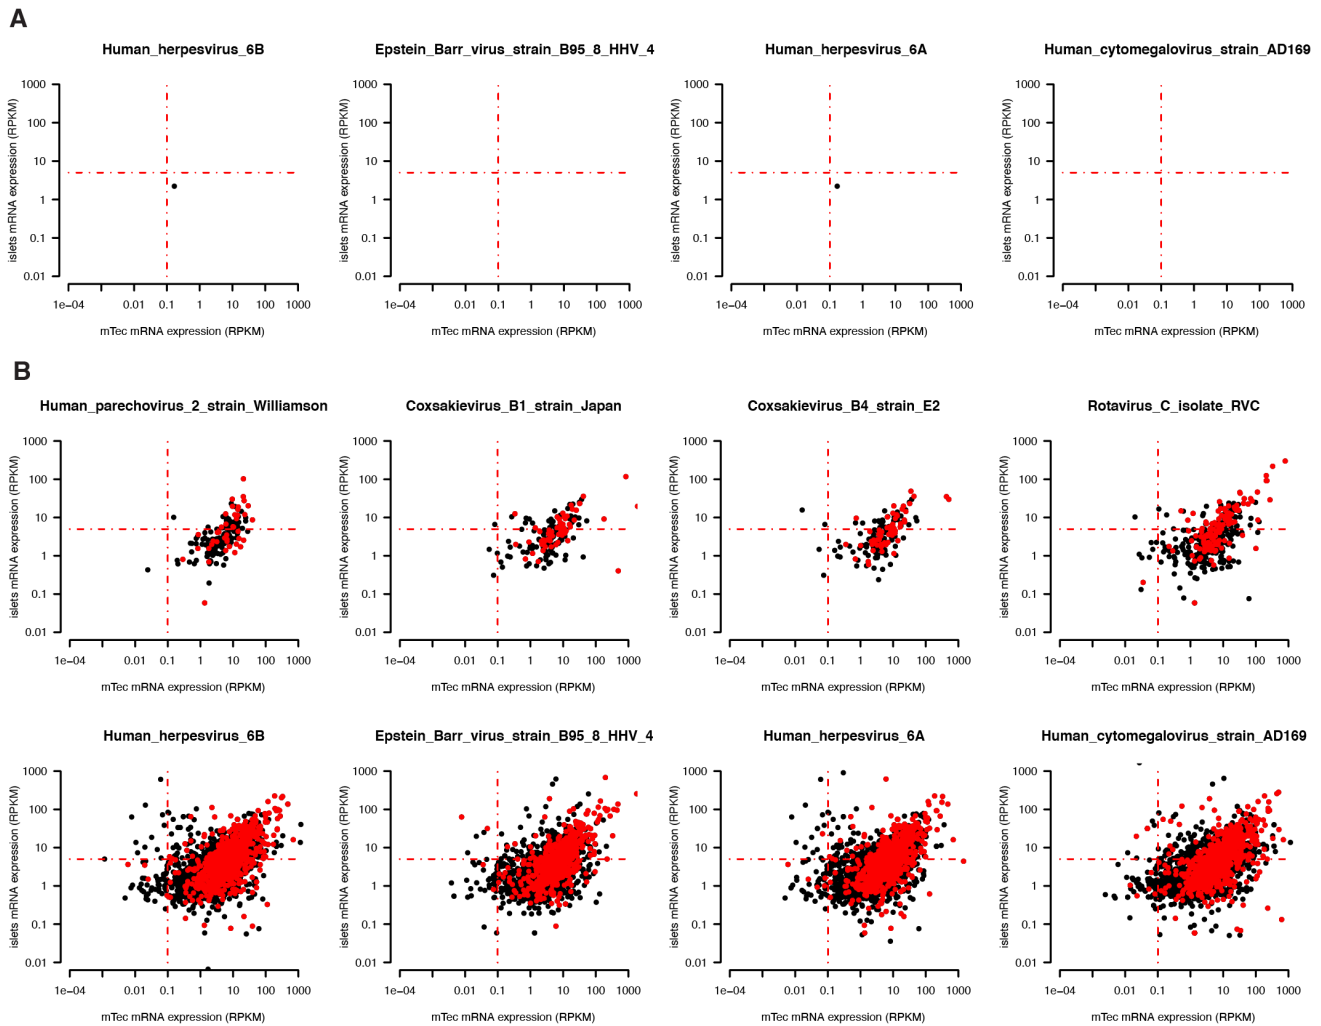

**Figure S4. Human pancreatic islets and mTECs' mRNA expression of antigens potentially carrying HLA-A\*11:01-restricted viral-human non-spliced and *cis*-spliced *zwitter* peptide candidates.** The scatter plots depict the distribution of RPKM of mRNA of human antigens, as measured by Gonzalez-Duque and colleagues [2] in human pancreatic islets and mTECs, that theoretically can carry (A) non-spliced and (B) *cis*-spliced viral-human *zwitter* epitope candidates. Scatter plots are divided based on the corresponding theoretical virus origin. In (A) only four out of eight viruses are shown because for four viruses no viral-human non-spliced peptide candidates with the required characteristics were estimated. Black dots represent antigens carrying epitope candidates predicted to bind the HLA-A\*11:01 allele. Red dots represent antigens carrying epitope candidates predicted to bind the HLA-A\*11:01 allele and located in hotspots, according to IEDB database.

## T1D-associated *cis*-spliced *twitter* epitope candidates

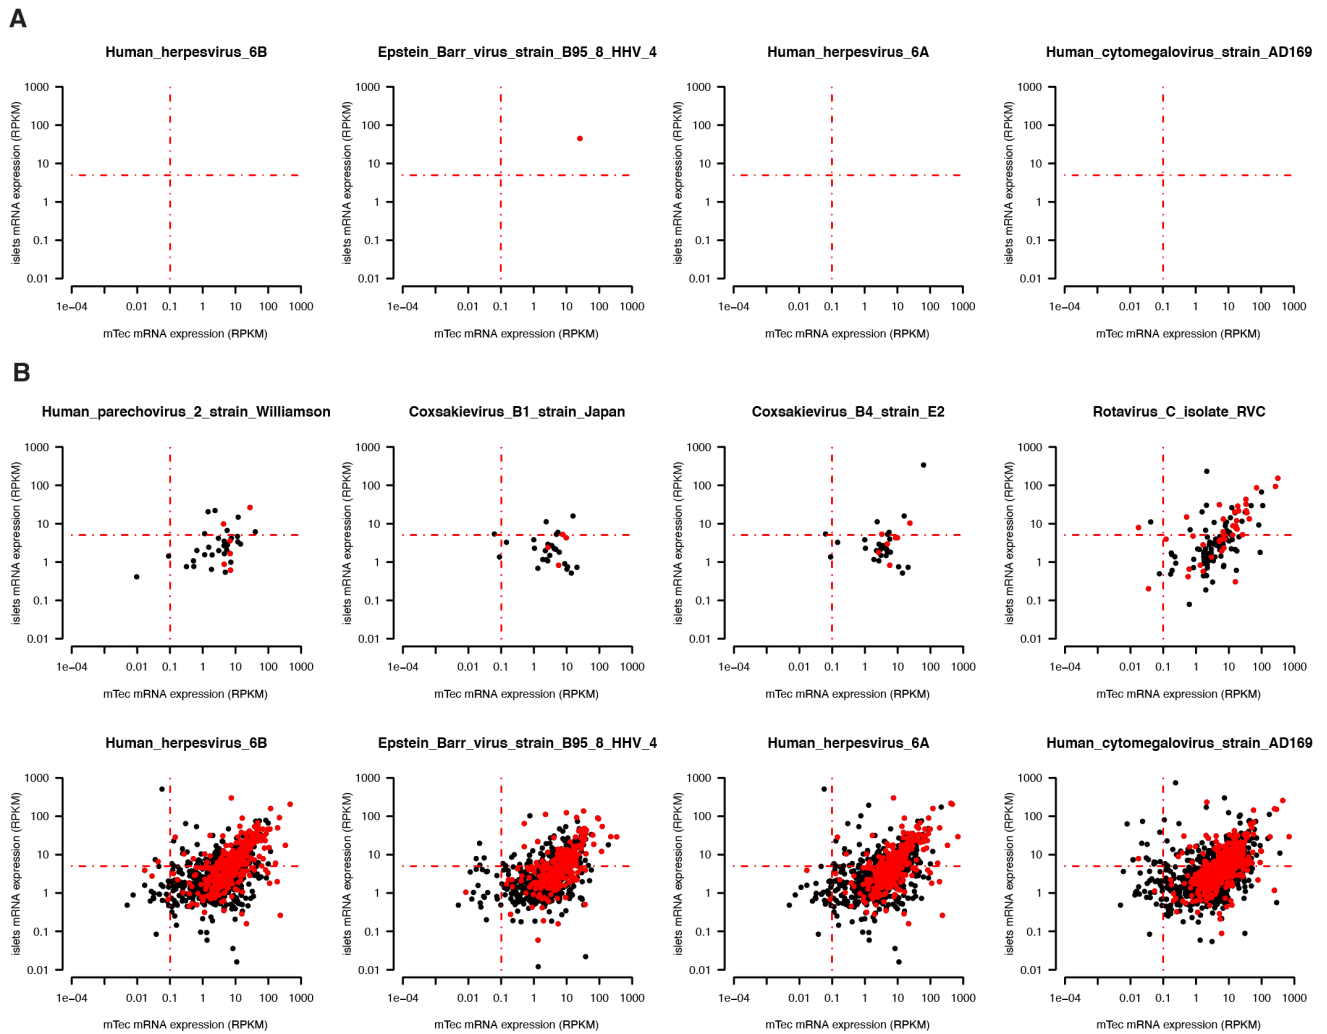

**Figure S5. Human pancreatic islets and mTECs' mRNA expression of antigens potentially carrying HLA-A\*23:01-restricted viral-human non-spliced and *cis*-spliced *twitter* peptide candidates.** The scatter plots depict the distribution of RPKM of mRNA of human antigens, as measured by Gonzalez-Duque and colleagues [2] in human pancreatic islets and mTECs, that theoretically can carry (A) non-spliced and (B) *cis*-spliced viral-human *twitter* epitope candidates. Scatter plots are divided based on the corresponding theoretical virus origin. In (A) only four out of eight viruses are shown because for four viruses no viral-human non-spliced peptide candidates with the required characteristics were estimated. Black dots represent antigens carrying epitope candidates predicted to bind the HLA-A\*23:01 allele. Red dots represent antigens carrying epitope candidates predicted to bind the HLA-A\*23:01 allele and located in hotspots, according to IEDB database.



## T1D-associated *cis*-spliced *zwitter* epitope candidates

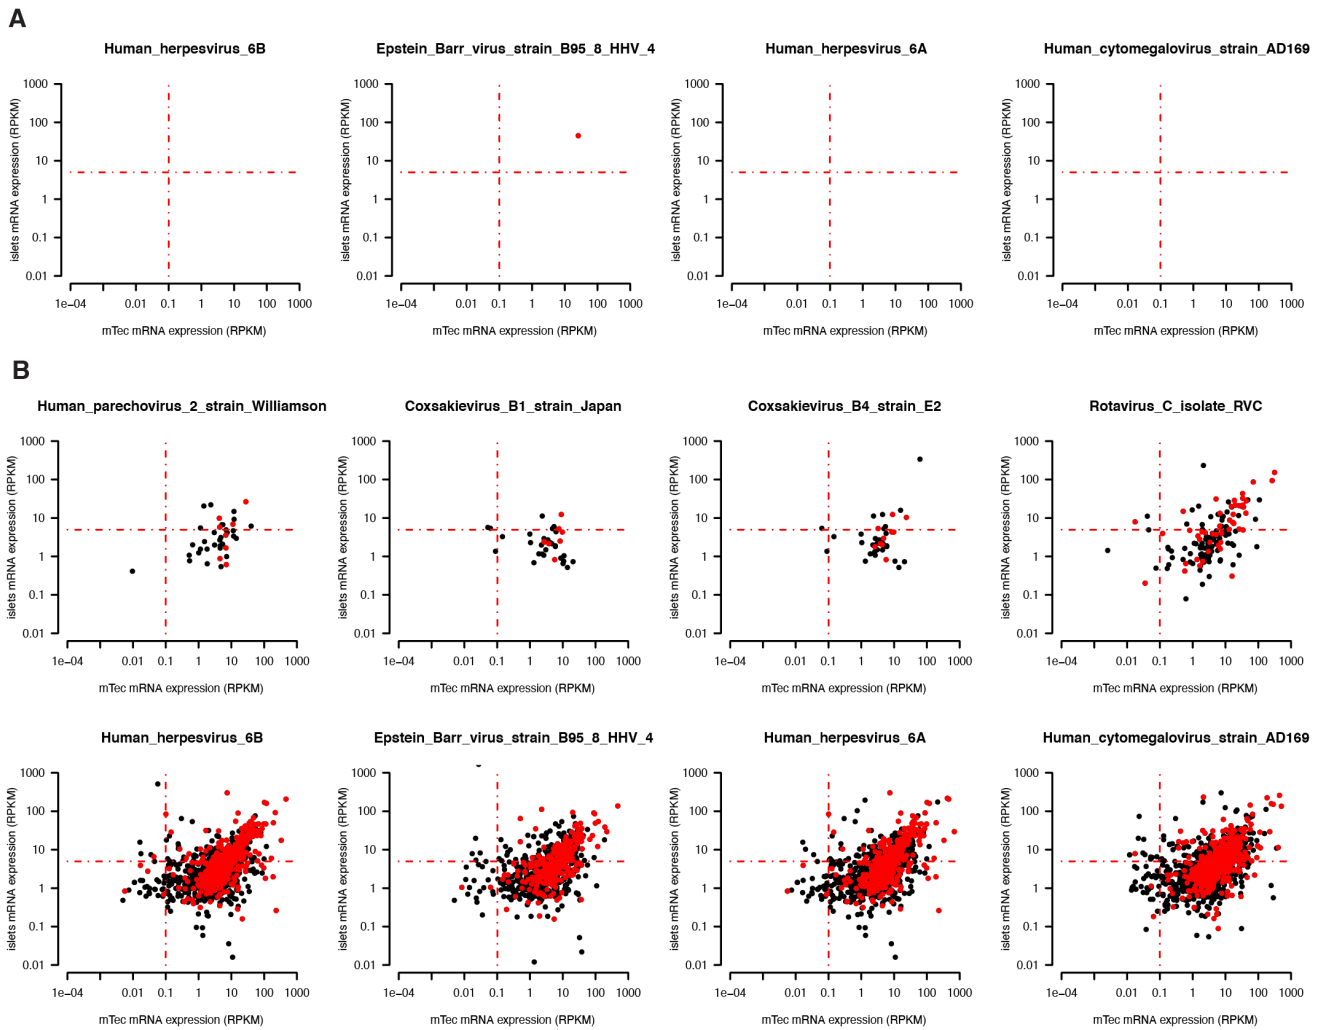

**Figure S6. Human pancreatic islets and mTECs' mRNA expression of antigens potentially carrying HLA-A\*24:02-restricted viral-human non-spliced and *cis*-spliced *zwitter* peptide candidates.** The scatter plots depict the distribution of RPKM of mRNA of human antigens, as measured by Gonzalez-Duque and colleagues [2] in human pancreatic islets and mTECs, that theoretically can carry (A) non-spliced and (B) *cis*-spliced viral-human *zwitter* epitope candidates. Scatter plots are divided based on the corresponding theoretical virus origin. In (A) only four out of eight viruses are shown because for four viruses no viral-human non-spliced peptide candidates with the required characteristics were estimated. Black dots represent antigens carrying epitope candidates predicted to bind the HLA-A\*24:02 allele. Red dots represent antigens carrying epitope candidates predicted to bind the HLA-A\*24:02 allele and located in hotspots, according to IEDB database.

## T1D-associated *cis*-spliced *zwitter* epitope candidates

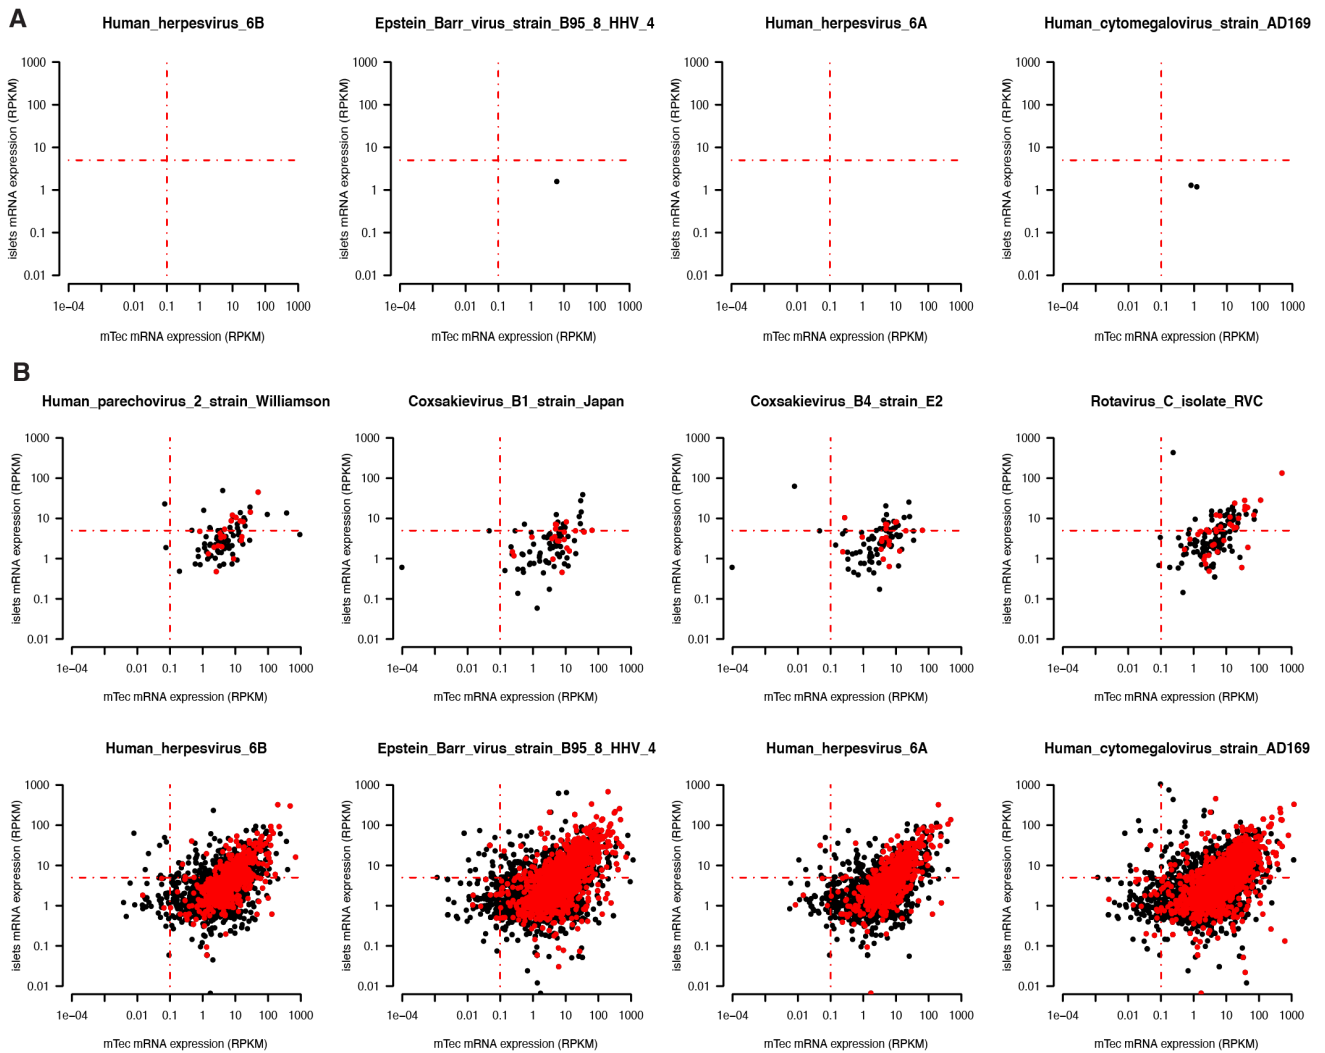

**Figure S7. Human pancreatic islets and mTECs' mRNA expression of antigens potentially carrying HLA-B\*07:02-restricted viral-human non-spliced and *cis*-spliced *zwitter* peptide candidates.** The scatter plots depict the distribution of RPKM of mRNA of human antigens, as measured by Gonzalez-Duque and colleagues [2] in human pancreatic islets and mTECs, that theoretically can carry (A) non-spliced and (B) *cis*-spliced viral-human *zwitter* epitope candidates. Scatter plots are divided based on the corresponding theoretical virus origin. In (A) only four out of eight viruses are shown because for four viruses no viral-human non-spliced peptide candidates with the required characteristics were estimated. Black dots represent antigens carrying epitope candidates predicted to bind the HLA-B\*07:02 allele. Red dots represent antigens carrying epitope candidates predicted to bind the HLA-B\*07:02 allele and located in hotspots, according to IEDB database.

## T1D-associated *cis*-spliced *zwitter* epitope candidates

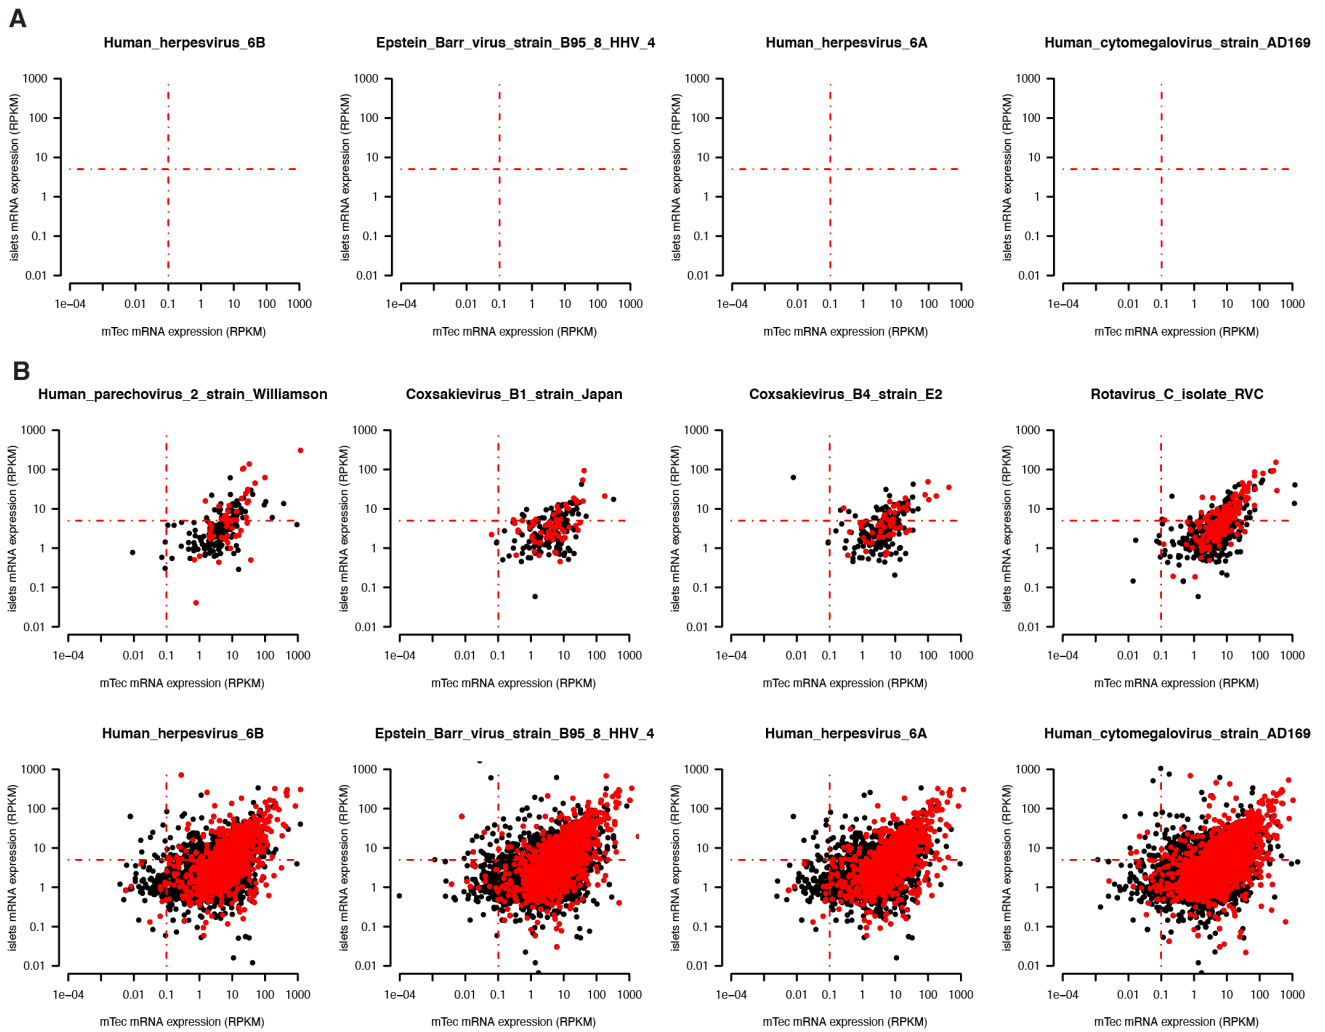

**Figure S8. Human pancreatic islets and mTECs' mRNA expression of antigens potentially carrying HLA-B\*08:01-restricted viral-human non-spliced and *cis*-spliced *zwitter* peptide candidates.** The scatter plots depict the distribution of RPKM of mRNA of human antigens, as measured by Gonzalez-Duque and colleagues [2] in human pancreatic islets and mTECs, that theoretically can carry (A) non-spliced and (B) *cis*-spliced viral-human *zwitter* epitope candidates. Scatter plots are divided based on the corresponding theoretical virus origin. In (A) only four out of eight viruses are shown because for four viruses no viral-human non-spliced peptide candidates with the required characteristics were estimated. Black dots represent antigens carrying epitope candidates predicted to bind the HLA-B\*08:01 allele. Red dots represent antigens carrying epitope candidates predicted to bind the HLA-B\*08:01 allele and located in hotspots, according to IEDB database.

## T1D-associated *cis*-spliced *zwitter* epitope candidates

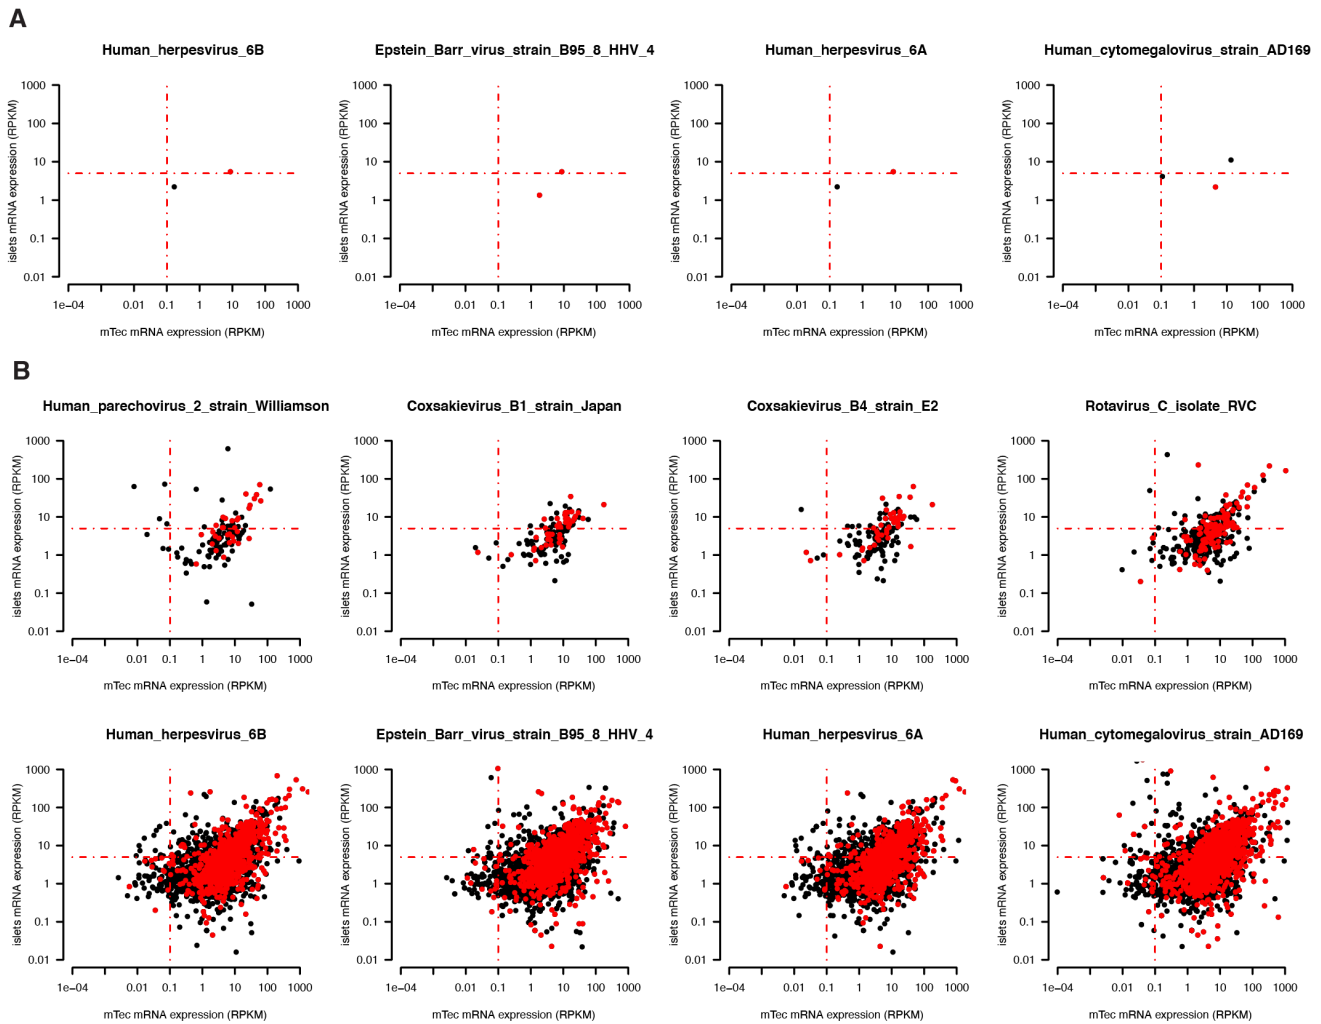

**Figure S9. Human pancreatic islets and mTECs' mRNA expression of antigens potentially carrying HLA-B\*15:01-restricted viral-human non-spliced and *cis*-spliced *zwitter* peptide candidates.** The scatter plots depict the distribution of RPKM of mRNA of human antigens, as measured by Gonzalez-Duque and colleagues [2] in human pancreatic islets and mTECs, that theoretically can carry (A) non-spliced and (B) *cis*-spliced viral-human *zwitter* epitope candidates. Scatter plots are divided based on the corresponding theoretical virus origin. In (A) only four out of eight viruses are shown because for four viruses no viral-human non-spliced peptide candidates with the required characteristics were estimated. Black dots represent antigens carrying epitope candidates predicted to bind the HLA-B\*15:01 allele. Red dots represent antigens carrying epitope candidates predicted to bind the HLA-B\*15:01 allele and located in hotspots, according to IEDB database.

## T1D-associated *cis*-spliced *zwitter* epitope candidates

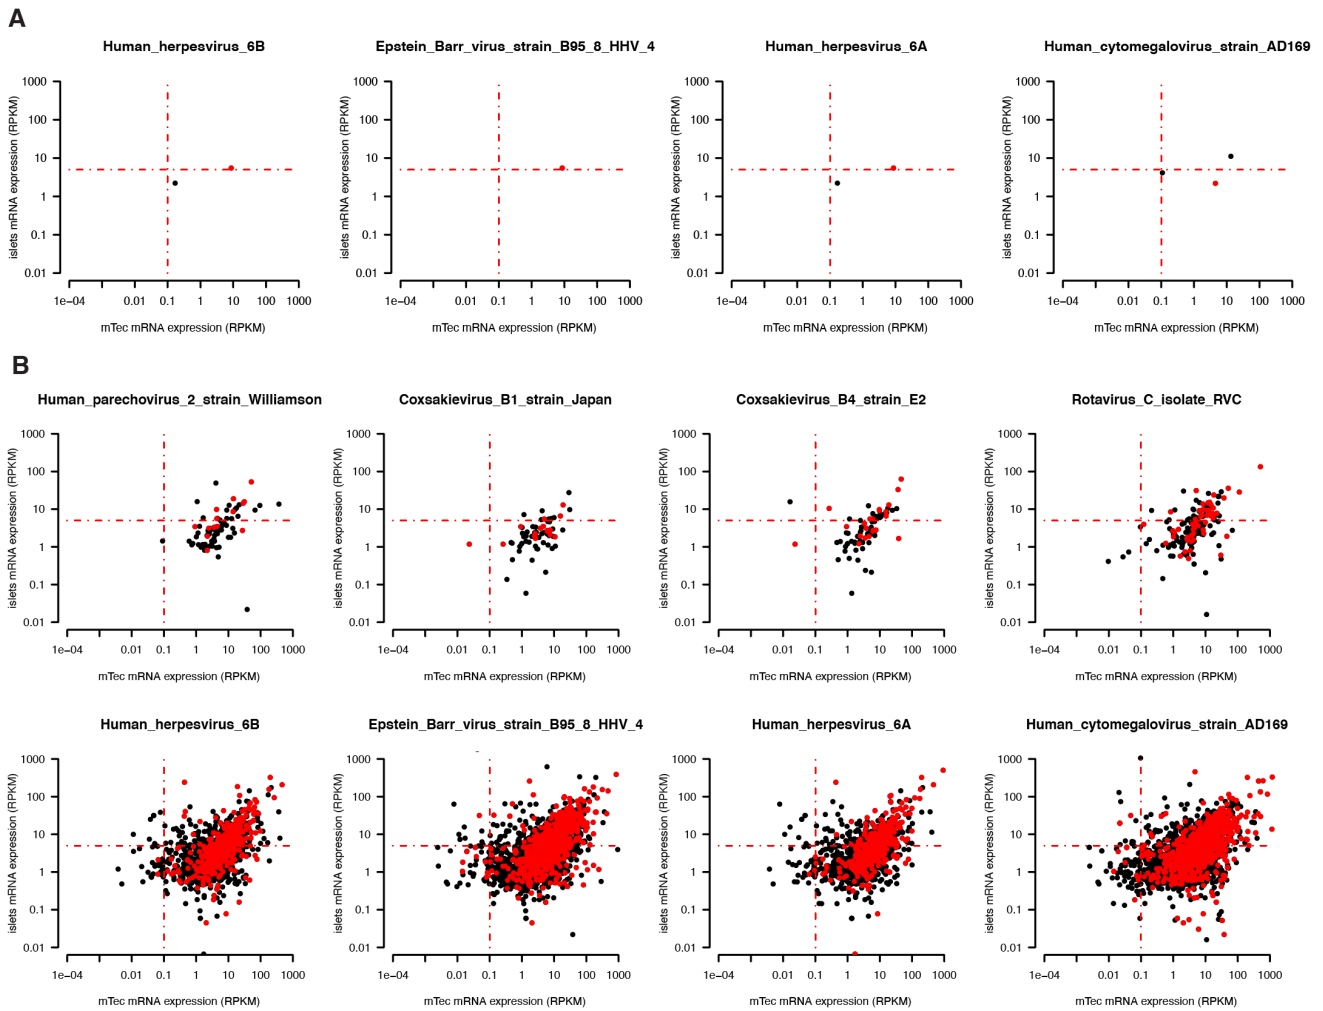

**Figure S10. Human pancreatic islets and mTECs' mRNA expression of antigens potentially carrying HLA-B\*35:01-restricted viral-human non-spliced and *cis*-spliced *zwitter* peptide candidates.** The scatter plots depict the distribution of RPKM of mRNA of human antigens, as measured by Gonzalez-Duque and colleagues [2] in human pancreatic islets and mTECs, that theoretically can carry (A) non-spliced and (B) *cis*-spliced viral-human *zwitter* epitope candidates. Scatter plots are divided based on the corresponding theoretical virus origin. In (A) only four out of eight viruses are shown because for four viruses no viral-human non-spliced peptide candidates with the required characteristics were estimated. Black dots represent antigens carrying epitope candidates predicted to bind the HLA-B\*35:01 allele. Red dots represent antigens carrying epitope candidates predicted to bind the HLA-B\*35:01 allele and located in hotspots, according to IEDB database.

## T1D-associated *cis*-spliced *zwitter* epitope candidates

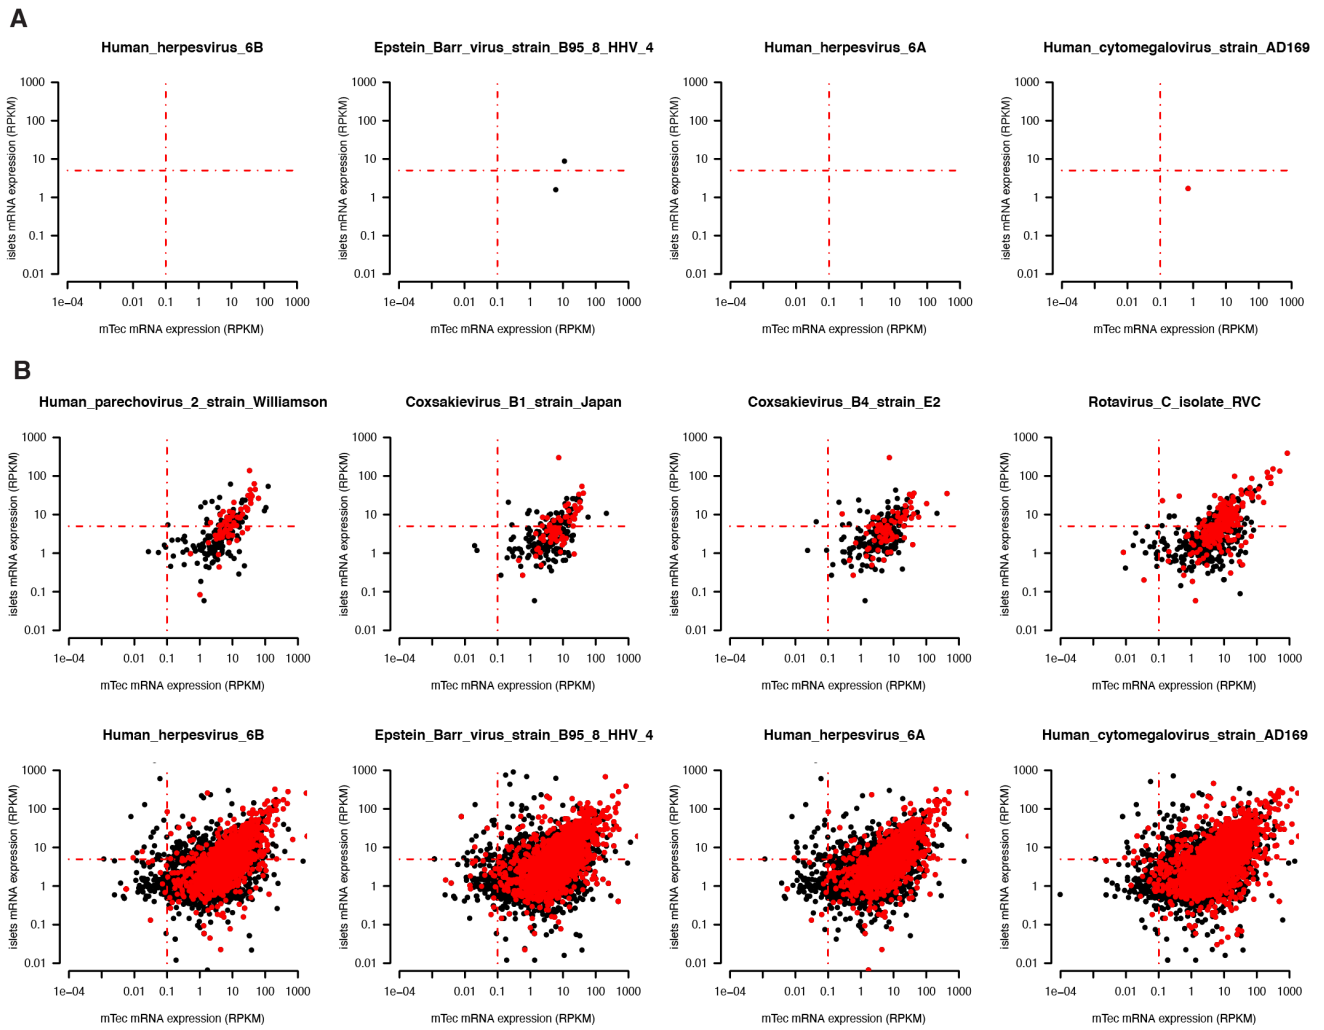

**Figure S11. Human pancreatic islets and mTECs' mRNA expression of antigens potentially carrying HLA-B\*39:06-restricted viral-human non-spliced and *cis*-spliced *zwitter* peptide candidates.** The scatter plots depict the distribution of RPKM of mRNA of human antigens, as measured by Gonzalez-Duque and colleagues [2] in human pancreatic islets and mTECs, that theoretically can carry (A) non-spliced and (B) *cis*-spliced viral-human *zwitter* epitope candidates. Scatter plots are divided based on the corresponding theoretical virus origin. In (A) only four out of eight viruses are shown because for four viruses no viral-human non-spliced peptide candidates with the required characteristics were estimated. Black dots represent antigens carrying epitope candidates predicted to bind the HLA-B\*39:06 allele. Red dots represent antigens carrying epitope candidates predicted to bind the HLA-B\*39:06 allele and located in hotspots, according to IEDB database.

## T1D-associated *cis*-spliced *zwitter* epitope candidates

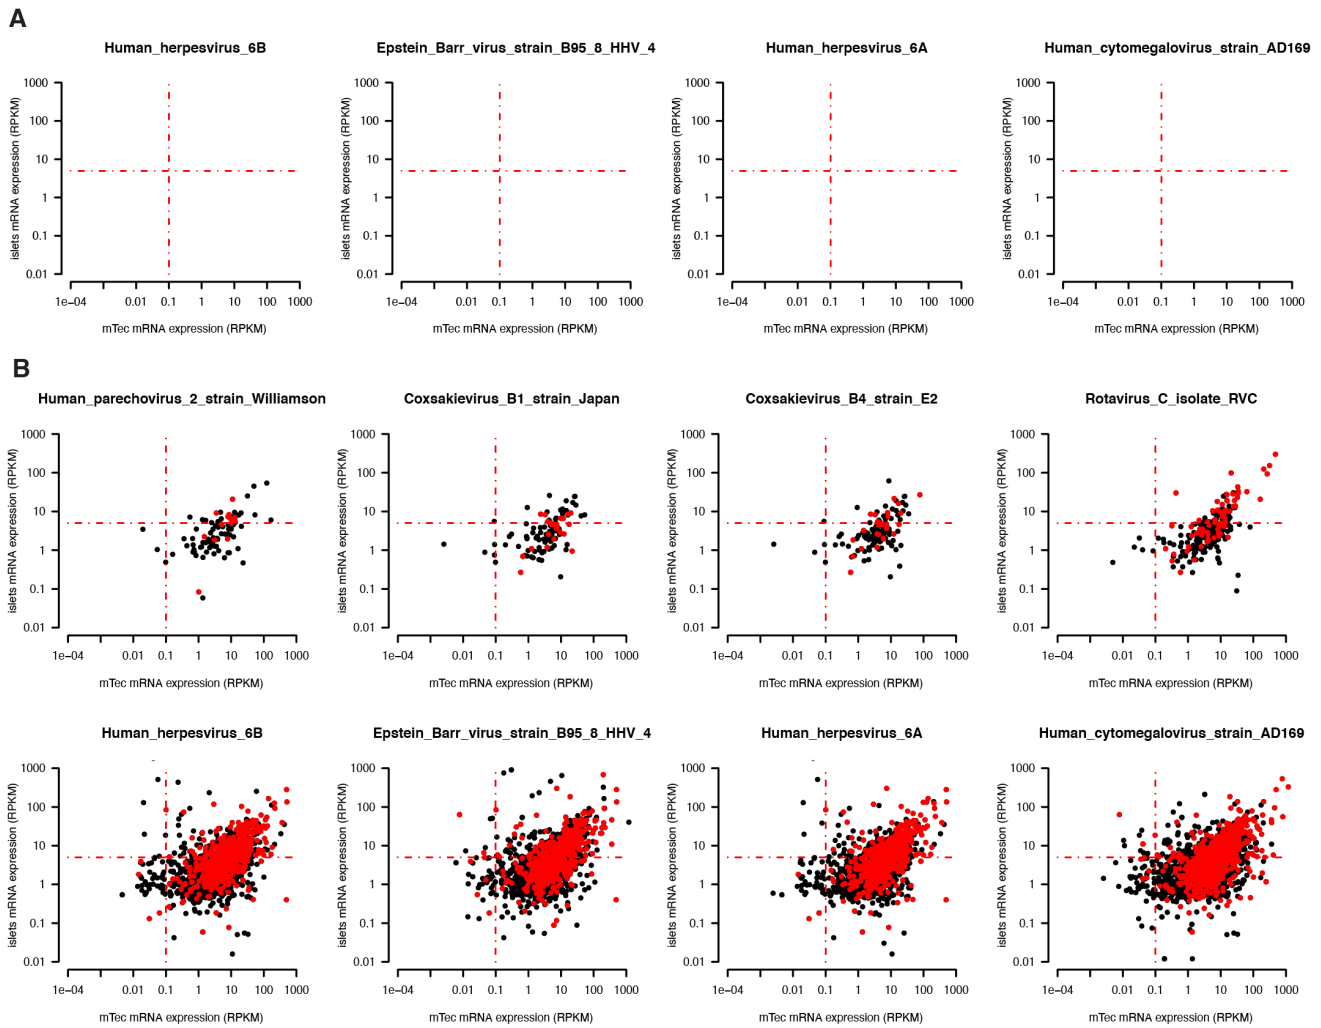

**Figure S12. Human pancreatic islets and mTECs' mRNA expression of antigens potentially carrying HLA-B\*40:01-restricted viral-human non-spliced and *cis*-spliced *zwitter* peptide candidates.** The scatter plots depict the distribution of RPKM of mRNA of human antigens, as measured by Gonzalez-Duque and colleagues [2] in human pancreatic islets and mTECs, that theoretically can carry (A) non-spliced and (B) *cis*-spliced viral-human *zwitter* epitope candidates. Scatter plots are divided based on the corresponding theoretical virus origin. In (A) only four out of eight viruses are shown because for four viruses no viral-human non-spliced peptide candidates with the required characteristics were estimated. Black dots represent antigens carrying epitope candidates predicted to bind the HLA-B\*40:01 allele. Red dots represent antigens carrying epitope candidates predicted to bind the HLA-B\*40:01 allele and located in hotspots, according to IEDB database.

## T1D-associated *cis*-spliced *zwitter* epitope candidates

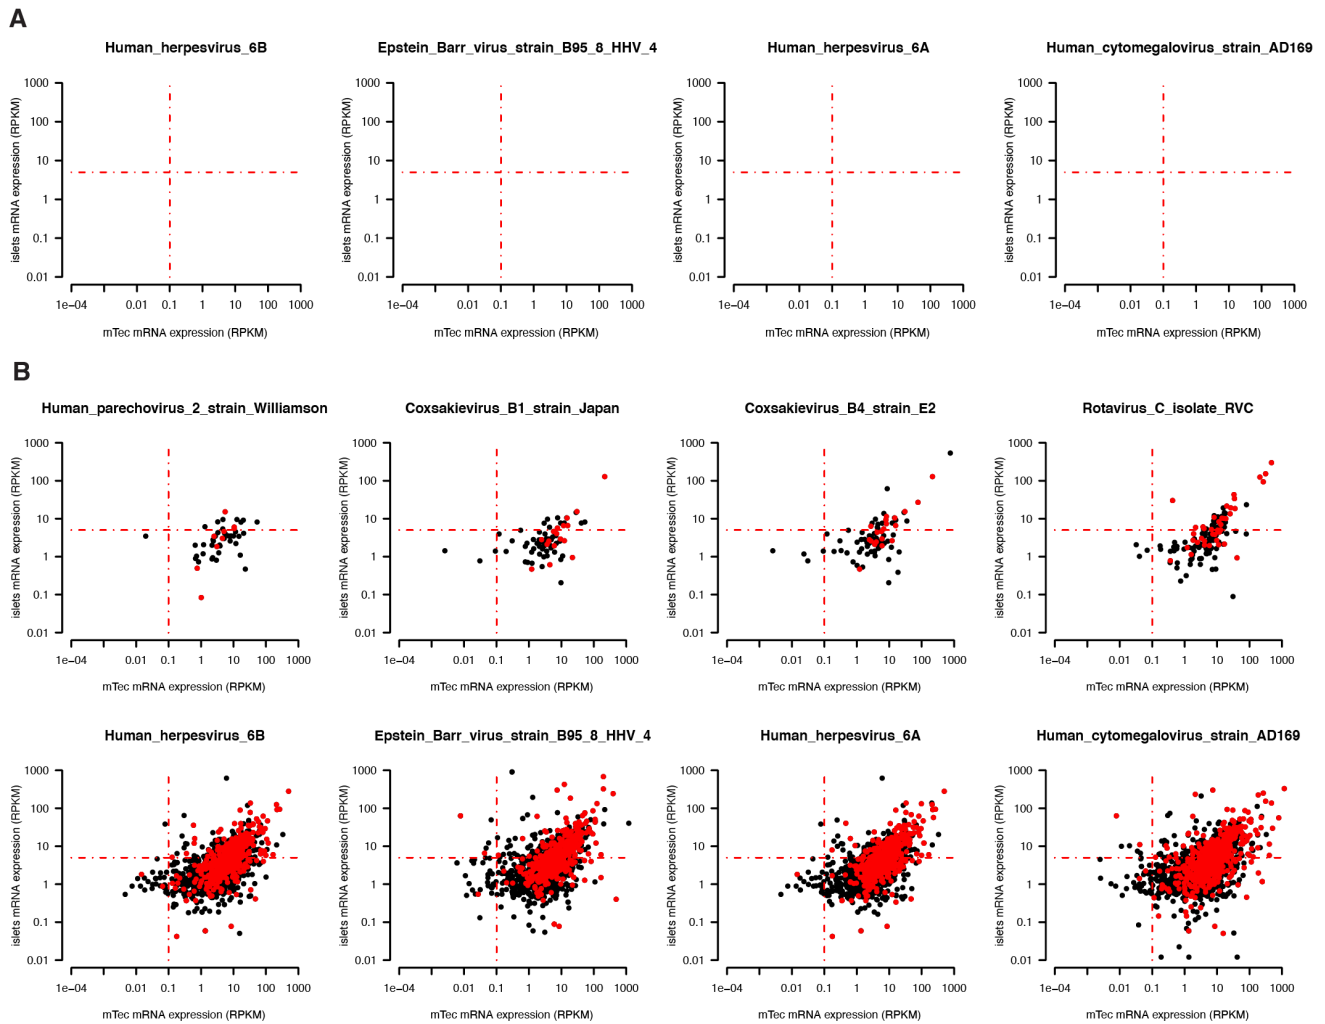

**Figure S13. Human pancreatic islets and mTECs' mRNA expression of antigens potentially carrying HLA-B\*44:02-restricted viral-human non-spliced and *cis*-spliced *zwitter* peptide candidates.** The scatter plots depict the distribution of RPKM of mRNA of human antigens, as measured by Gonzalez-Duque and colleagues [2] in human pancreatic islets and mTECs, that theoretically can carry (A) non-spliced and (B) *cis*-spliced viral-human *zwitter* epitope candidates. Scatter plots are divided based on the corresponding theoretical virus origin. In (A) only four out of eight viruses are shown because for four viruses no viral-human non-spliced peptide candidates with the required characteristics were estimated. Black dots represent antigens carrying epitope candidates predicted to bind the HLA-B\*44:02 allele. Red dots represent antigens carrying epitope candidates predicted to bind the HLA-B\*44:02 allele and located in hotspots, according to IEDB database.



## T1D-associated *cis*-spliced *zwitter* epitope candidates

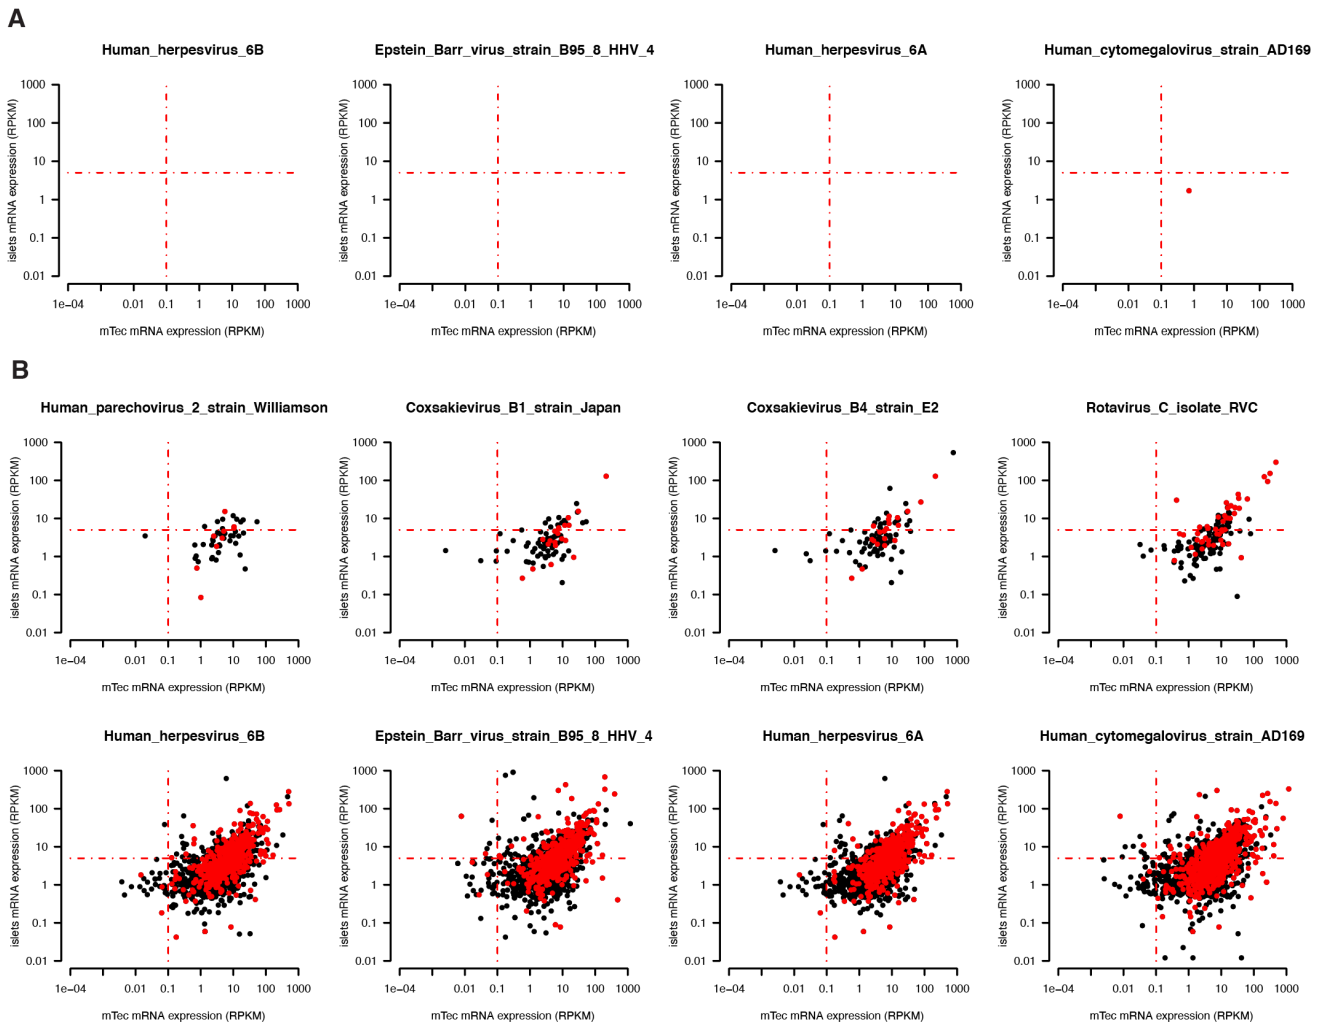

**Figure S14. Human pancreatic islets and mTECs' mRNA expression of antigens potentially carrying HLA-B\*44:03-restricted viral-human non-spliced and *cis*-spliced *zwitter* peptide candidates.** The scatter plots depict the distribution of RPKM of mRNA of human antigens, as measured by Gonzalez-Duque and colleagues [2] in human pancreatic islets and mTECs, that theoretically can carry (A) non-spliced and (B) *cis*-spliced viral-human *zwitter* epitope candidates. Scatter plots are divided based on the corresponding theoretical virus origin. In (A) only four out of eight viruses are shown because for four viruses no viral-human non-spliced peptide candidates with the required characteristics were estimated. Black dots represent antigens carrying epitope candidates predicted to bind the HLA-B\*44:03 allele. Red dots represent antigens carrying epitope candidates predicted to bind the HLA-B\*44:03 allele and located in hotspots, according to IEDB database.

## T1D-associated *cis*-spliced *zwitter* epitope candidates

### References

- [1] R. Vita, S. Mahajan, J.A. Overton, S.K. Dhanda, S. Martini, J.R. Cantrell, D.K. Wheeler, A. Sette, and B. Peters, The Immune Epitope Database (IEDB): 2018 update. *Nucleic Acids Res* 47 (2019) D339-D343.
- [2] S. Gonzalez-Duque, M.E. Azoury, M.L. Colli, G. Afonso, J.V. Turatsinze, L. Nigi, A.I. Lalanne, G. Sebastiani, A. Carre, S. Pinto, S. Culina, N. Corcos, M. Bugliani, P. Marchetti, M. Armanet, M. Diedisheim, B. Kyewski, L.M. Steinmetz, S. Buus, S. You, D. Dubois-Laforgue, E. Larger, J.P. Beressi, G. Bruno, F. Dotta, R. Scharfmann, D.L. Eizirik, Y. Verdier, J. Vinh, and R. Mallone, Conventional and Neo-Antigenic Peptides Presented by beta Cells Are Targeted by Circulating Naive CD8+ T Cells in Type 1 Diabetic and Healthy Donors. *Cell Metab* (2018).
- [3] V. Jurtz, S. Paul, M. Andreatta, P. Marcatili, B. Peters, and M. Nielsen, NetMHCpan-4.0: Improved Peptide-MHC Class I Interaction Predictions Integrating Eluted Ligand and Peptide Binding Affinity Data. *J Immunol* 199 (2017) 3360-3368.
